# Supplementary material
Source: MDPI journal article supplement (https://www.mdpi.com/2072-4292/13/18/3663)
Supplement: s1 [file s1]

## Supplementary Materials

Table S1. Parameters of RF and XGBoost with different inputs

| Bands (B)             | RF             |             | XGBoost        |               |                   |
|-----------------------|----------------|-------------|----------------|---------------|-------------------|
|                       | number-of-tree | max-feature | number-of-tree | learning-rate | max-depth-of-tree |
| Red                   | 100            | 1           | 100            | 0.05          | 5                 |
| Blue                  | 100            | 1           | 100            | 0.01          | 6                 |
| Green                 | 150            | 1           | 100            | 0.01          | 6                 |
| NIR                   | 100            | 1           | 100            | 0.05          | 6                 |
| RE                    | 100            | 1           | 100            | 0.05          | 6                 |
| Red+NIR               | 200            | 2           | 50             | 0.05          | 6                 |
| Red+Green+NIR         | 200            | 2           | 50             | 0.05          | 9                 |
| Red+Blue+Green+NIR    | 150            | 2           | 100            | 0.05          | 12                |
| Red+Blue+Green+NIR+RE | 200            | 2           | 100            | 0.05          | 9                 |
| NDVI                  | 100            | 1           | 100            | 0.01          | 6                 |
| GNDVI                 | 100            | 1           | 100            | 0.01          | 6                 |
| LCI                   | 100            | 1           | 150            | 0.01          | 6                 |
| NDRE                  | 50             | 1           | 50             | 0.01          | 6                 |
| OSAVI                 | 100            | 1           | 150            | 0.05          | 6                 |
| LCI+NDRE              | 100            | 2           | 100            | 0.05          | 12                |
| GNDVI+LCI+NDRE        | 150            | 2           | 100            | 0.05          | 12                |
| NDVI+GNDVI+LCI+NDRE   | 200            | 2           | 100            | 0.01          | 15                |

|                                   |     |   |     |      |    |
|-----------------------------------|-----|---|-----|------|----|
| OSAVI+NDVI+GNDVI+LCI+NDRE         | 200 | 2 | 100 | 0.05 | 15 |
| Red+NIR+OSAVI+NDVI+GNDVI+LCI+NDRE | 200 | 2 | 100 | 0.05 | 15 |
| ALL-10                            | 200 | 3 | 100 | 0.05 | 15 |

---

Table S2. Statistical evaluation for the RF and XGBoost with multispectral bands (B) as input variables during the training period

| Bands (B)             | RF    |                |       |       |       | XGBoost |                |       |       |       |
|-----------------------|-------|----------------|-------|-------|-------|---------|----------------|-------|-------|-------|
|                       | RMSE  | R <sup>2</sup> | MAE   | NSE   | MAPE  | RMSE    | R <sup>2</sup> | MAE   | NSE   | MAPE  |
| Red                   | 0.681 | 0.971          | 0.466 | 0.968 | 0.228 | 0.898   | 0.731          | 0.611 | 0.728 | 0.266 |
| Blue                  | 0.777 | 0.963          | 0.522 | 0.962 | 0.208 | 1.101   | 0.642          | 0.743 | 0.631 | 0.324 |
| Green                 | 0.679 | 0.969          | 0.433 | 0.969 | 0.236 | 0.968   | 0.717          | 0.701 | 0.701 | 0.305 |
| NIR                   | 0.668 | 0.973          | 0.450 | 0.971 | 0.249 | 0.852   | 0.785          | 0.621 | 0.777 | 0.271 |
| RE                    | 0.728 | 0.960          | 0.592 | 0.959 | 0.308 | 1.102   | 0.578          | 0.854 | 0.575 | 0.372 |
| Red+NIR               | 0.433 | 0.988          | 0.253 | 0.987 | 0.135 | 0.614   | 0.893          | 0.373 | 0.884 | 0.163 |
| Red+Green+NIR         | 0.479 | 0.988          | 0.332 | 0.988 | 0.191 | 0.605   | 0.901          | 0.329 | 0.898 | 0.143 |
| Red+Blue+Green+NIR    | 0.472 | 0.988          | 0.324 | 0.988 | 0.175 | 0.588   | 0.911          | 0.318 | 0.903 | 0.139 |
| Red+Blue+Green+NIR+RE | 0.411 | 0.989          | 0.267 | 0.989 | 0.163 | 0.591   | 0.905          | 0.301 | 0.902 | 0.131 |

Table S3. Statistical evaluation for the RF and XGBoost with vegetation indexes (VIs) as input variables during the training period

| Vegetation indexes (VIs)  | RF    |                |       |       |       | XGBoost |                |       |       |       |
|---------------------------|-------|----------------|-------|-------|-------|---------|----------------|-------|-------|-------|
|                           | RMSE  | R <sup>2</sup> | MAE   | NSE   | MAPE  | RMSE    | R <sup>2</sup> | MAE   | NSE   | MAPE  |
| NDVI                      | 0.497 | 0.990          | 0.307 | 0.992 | 0.153 | 0.700   | 0.855          | 0.440 | 0.855 | 0.149 |
| GNDVI                     | 0.477 | 0.987          | 0.345 | 0.995 | 0.206 | 0.643   | 0.871          | 0.394 | 0.867 | 0.134 |
| LCI                       | 0.450 | 0.996          | 0.262 | 0.996 | 0.134 | 0.600   | 0.882          | 0.374 | 0.881 | 0.127 |
| NDRE                      | 0.469 | 0.997          | 0.321 | 0.994 | 0.157 | 0.626   | 0.880          | 0.404 | 0.876 | 0.137 |
| OSAVI                     | 0.560 | 0.984          | 0.313 | 0.991 | 0.185 | 0.771   | 0.820          | 0.491 | 0.818 | 0.166 |
| LCI+NDRE                  | 0.456 | 0.992          | 0.320 | 0.996 | 0.163 | 0.593   | 0.887          | 0.377 | 0.887 | 0.128 |
| GNDVI+LCI+NDRE            | 0.473 | 0.989          | 0.316 | 0.989 | 0.158 | 0.625   | 0.890          | 0.353 | 0.889 | 0.119 |
| NDVI+GNDVI+LCI+NDRE       | 0.483 | 0.995          | 0.248 | 0.992 | 0.200 | 0.585   | 0.891          | 0.315 | 0.895 | 0.107 |
| OSAVI+NDVI+GNDVI+LCI+NDRE | 0.412 | 0.995          | 0.244 | 0.997 | 0.125 | 0.590   | 0.899          | 0.340 | 0.895 | 0.115 |

Table S4. Statistical evaluation for the RF and XGBoost with multispectral bands and vegetation indexes (VIs) as input variables during the training period

| Model Type         |                | RF                  |        | XGBoost             |        |
|--------------------|----------------|---------------------|--------|---------------------|--------|
| Inputs             |                | Red+NIR+OSAVI+NDVI+ | ALL-10 | Red+NIR+OSAVI+NDVI+ | ALL-10 |
|                    |                | GNDVI+LCI+NDRE      |        | GNDVI+LCI+NDRE      |        |
| Evaluation indices | RMSE           | 0.388               | 0.393  | 0.514               | 0.525  |
|                    | R <sup>2</sup> | 0.996               | 0.995  | 0.932               | 0.933  |
|                    | MAE            | 0.211               | 0.221  | 0.288               | 0.274  |
|                    | NSE            | 0.994               | 0.994  | 0.93                | 0.933  |
|                    | MAPE           | 0.076               | 0.081  | 0.127               | 0.127  |
